# Supplementary material for: An all-solid-state imprinted polymer-based potentiometric sensor for determination of bisphenol S
Source: Royal Society of Chemistry journal article supplement (doi:10.1039/c6ra14461f), 2016-01-01
Supplement: c6ra14461f1.pdf [file c6ra14461f1.pdf]

## Supporting Information

### **An all-solid-state imprinted polymer-based potentiometric sensor for determination of bisphenol S**

Tiantian Wang <sup>a,b</sup>, Rongning Liang <sup>\*,b</sup>, Tanji Yin <sup>b</sup>, Ruiqing Yao<sup>\*,a</sup> and Wei Qin <sup>b</sup>

<sup>a</sup> *School of Chemical engineering, Northwest University, Xi'an 710069, P. R. China.*

<sup>b</sup> *Key Laboratory of Coastal Environmental Processes and Ecological Remediation, Yantai Institute of Coastal Zone Research (YIC), Chinese Academy of Sciences(CAS); Shandong Provincial Key Laboratory of Coastal Environmental Processes, YICCAS, Yantai, Shandong 264003, P. R. China.*

\*Corresponding author. Tel.: +86-535-2109234, Fax: +86-535-2109000.

E-mail address: [rnliang@yic.ac.cn](mailto:rnliang@yic.ac.cn) (R. N. Liang); [yaoruiqing@nwu.edu.cn](mailto:yaoruiqing@nwu.edu.cn) (R. Q. Yao)

## 1 ***Reagents and materials***

2 Bisphenol S (BPS), 4,4'-sulfonyldiphenol, acetonitrile (ACN), sodium hydroxide, methanol, benzyl  
3 alcohol, zinc chloride and tetrahydrofuran (THF) were obtained from Guoyao Chemical Reagent Co.,  
4 Ltd (Shanghai, China). Methacrylic acid (MAA), ethylene glycoldimethacrylate (EGDMA), 4-  
5 vinylpyridine (4-VP) and 2,2'-azobisisobutyronitrile (AIBN) were purchased from Aladdin Shanghai  
6 Reagent Company. High molecular weight poly(vinyl chloride) (PVC), dioctylphthalate (DOP),  
7 tridodecylmethylammoniumchloride (TDMAC) and tetradodecylammonium tetrakis(4-  
8 chlorophenyl)borate (ETH 500) were purchased from Sigma-Aldrich. MAA and THF were distilled  
9 prior to use. All other reagents were analytical grade and used as received. Aqueous solutions were  
10 prepared by dissolving the appropriate salts in the freshly de-ionized water (18.2MΩ cm specific  
11 resistance) obtained with a Pall Cascada laboratory water system.

## 12 ***Synthesis of the molecularly imprinted polymer (MIP)***

13 The BPS MIP beads were synthesized by the precipitation polymerization method as described  
14 elsewhere.<sup>1,2</sup> The template BPS (1 mmol), MAA (2mmol), 4-VP (2 mmol), EGDMA (10 mmol) and  
15 AIBN (50 mg) were dissolved in ACN (25 mL) in a 50 mL flask. The solution was degassed with N<sub>2</sub>  
16 for 10 min and then sealed under N<sub>2</sub> atmosphere. The polymerization was performed by placing the  
17 flask in an oil bath at 60 °C for 18 h. After polymerization, the polymer particles were added to a  
18 mixture of methanol/1 M NaOH (75:25, v/v), and heated in reflux with stirring for 20 h to remove the  
19 template. The non-imprinted polymer (NIP) was synthesized by the similar procedures except for  
20 omission of the template. The obtained MIP and NIP beads were characterized by scanning electron  
21 microscopy (SEM; Hitachi, S-4800).

## 22 ***Fabrication of the nanoporous gold (NPG) film***

23 The NPG film was fabricated by the multicyclic electrochemical alloying/dealloying method as  
24 described before.<sup>3,4</sup> Briefly, the alloying/dealloying process was carried out in a benzyl alcohol solution  
25 containing ZnCl<sub>2</sub> with a three-electrode system controlled by CHI 660C Electrochemical Workstation  
26 (CH Instruments Inc.). A freshly polished gold electrode was used as the working electrode. A Zn wire  
27 was utilized as the reference electrode, and a Zn plate served as the auxiliary electrode. The  
28 electrochemical cycles were first recorded at 120 °C from the open circuit potential to -0.72 V and then

1 repeatedly scanned in the potential range from -0.72 to 1.88 V (vs Zn). The obtained NPG film-based  
2 electrodes were finally washed with benzyl alcohol, ethanol, and de-ionized water in sequence.

3 Cyclic voltammetry (CV) was conducted in 0.5 M H<sub>2</sub>SO<sub>4</sub> to characterize the real surface areas of the  
4 Au/NPG electrodes using a conventional three-electrode cell comprising the NPG film-based gold  
5 electrode as the working electrode, a Ag/AgCl/3 M KCl electrode as the reference electrode and a  
6 platinum wire as the auxiliary electrode.

### 7 ***Preparation of the solid-contact electrodes***

8 The membrane cocktail was prepared by dissolving 360 mg of components in 4.5 mL THF: MIP or  
9 NIP (6.0 wt%), TDMAC (1.5 wt%), ETH 500 (2.0 wt%), PVC (35.9 wt%), and DOP (54.6 wt%), and  
10 then degassed by sonication for 10 min. 100  $\mu$ L membrane cocktail was drop-cast onto the NPG film-  
11 based electrode and allowed to dry for 2 h. For comparison, the coated-wire electrode (CWE) was  
12 fabricated with the membrane cocktail directly casted on the polished gold electrode. For  
13 potentiometric detection of deprotonated BPS, the electrodes were conditioned in 10<sup>-4</sup> M BPS in 30  
14 mM NaHCO<sub>3</sub>/Na<sub>2</sub>CO<sub>3</sub> buffer of pH 10.2 for one day, while for neutral BPS, the electrodes were  
15 conditioned in 30 mM phosphate buffer solution (PBS) buffer with a pH of 5.0 for one day.

### 16 ***Electromotive force (EMF) measurements***

17 All measurements of EMF were performed at 20  $\pm$  1°C using a PXSJ-216L pH meter (Leici,  
18 Shanghai) with a saturated calomel electrode (SCE) as reference electrode in the galvanic cell:  
19 SCE//sample solution/ISE membrane/NPG film/bare gold electrode. For determination of deprotonated  
20 BPS, the EMF values were corrected for the liquid-junction potential according to the Henderson  
21 equation. The ion activity coefficient was calculated from the modified Debye-Hückel equation.<sup>5</sup>

### 22 ***References for the Supporting Information:***

- 23 1. K. Yoshimatsu, K. Reimhult, A. Krozer, K. Mosbach, K. Sode and L. Ye, *Anal. Chim. Acta*, 2007,  
24 **584**, 112-121.  
25 2. L. J. Kou, R. N. Liang, X. W. Wang, Y. Chen and W. Qin, *Anal. Bioanal. Chem.*, 2013, **405**, 4931-  
26 4936.  
27 3. F. L. Jia, C. F. Yu, Z. H. Ai and L. Z. Zhang, *Chem. Mater.*, 2007, **19**, 3648-3653.  
28 4. T. J. Yin, D. W. Pan and W. Qin, *Anal. Chem.*, 2014, **86**, 11038-11044.  
29 5. S. Kamaata, A. Bhale, Y. Fukunaga and H. Murata, *Anal. Chem.*, 1988, **60**, 2464-2467.

1

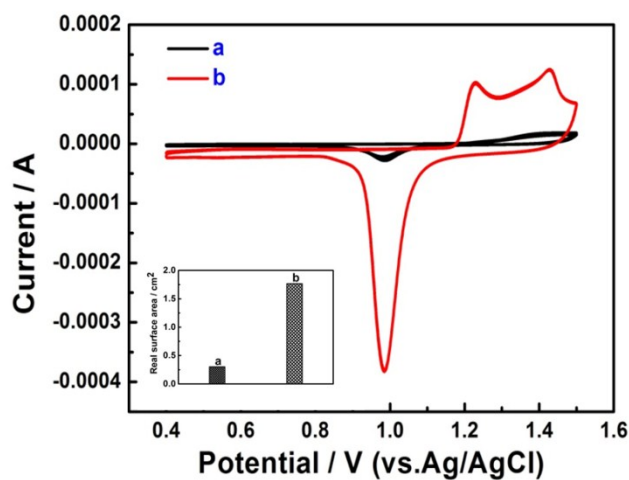

2

3 **Fig. S1** CVs for the bare Au electrode (a) and the Au/NPG electrode (b) recorded in 0.5 M H<sub>2</sub>SO<sub>4</sub> at a  
4 scan rate of 10 mV/s.

5

6

7

8

9

10

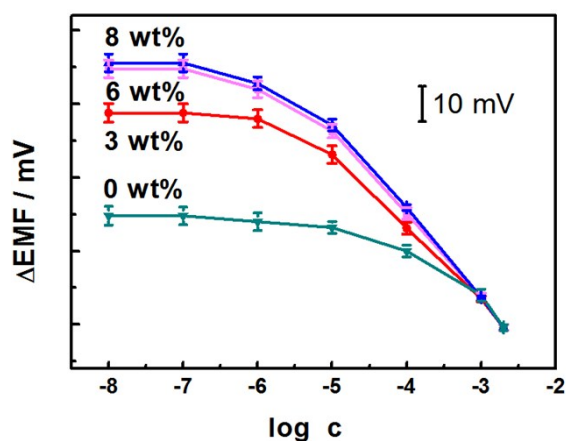

11

12 **Fig. S2** Effect of the amount of MIP on the potential response to deprotonated BPS. Experimental  
13 conditions: detection background, 30 mM NaHCO<sub>3</sub>/Na<sub>2</sub>CO<sub>3</sub> buffer of pH 10.2; conditioning solution,  
14 10<sup>-4</sup> M BPS in 30 mM NaHCO<sub>3</sub>/Na<sub>2</sub>CO<sub>3</sub> buffer of pH 10.2. Error bars represent one standard deviation  
15 for three measurements.

16

17

18

19

1

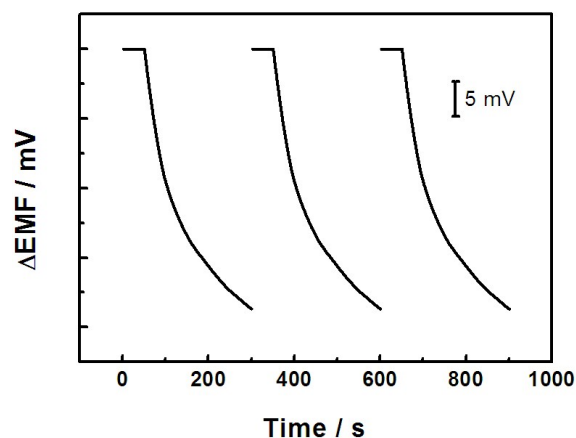

2

3 **Fig. S3** Recycle potential response profiles for 10  $\mu\text{M}$  neutral BPS. Experimental conditions: detection  
4 background, 30 mM PBS with a pH of 5.0; conditioning solution, the same as the detection background.

5

6

7

8

9

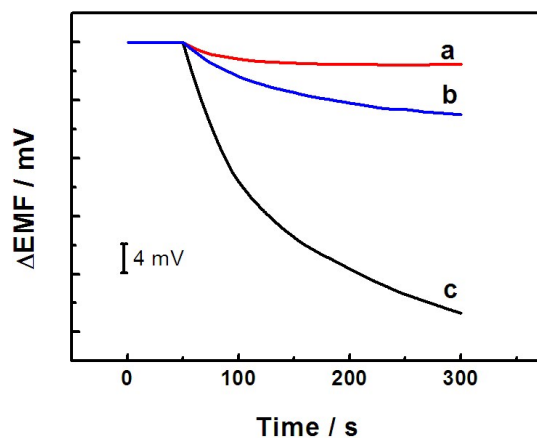

10

11 **Fig. S4** Dynamic potential responses to neutral BPS of 10  $\mu\text{M}$  using the blank (a), NIP (b) and MIP (c)  
12 membrane-based electrodes. Membrane ingredients (in wt%): (1) blank membrane, 1.5 % TDMAC, 2.0  
13 % ETH 500, 38.3 % PVC and 58.2 % DOP; (2) NIP membrane, 1.5 % TDMAC, 2.0 % ETH 500,  
14 35.9% PVC, 54.6 % DOP and 6.0 % NIP; (3) MIP membrane, 1.5 % TDMAC, 2.0 % ETH 500, 35.9%  
15 PVC, 54.6 % DOP and 6.0 % MIP. Other conditions are as given in Fig. S3.

16

17

18

19

20

21

1

2 **Table S1** Application of the proposed sensor to determination of neutral BSA in BPA-free baby bottles

| Sample   | Proposed sensor<br>( $\mu\text{M}$ ) <sup>a</sup> | HPLC<br>( $\mu\text{M}$ ) <sup>a</sup> | Recovery results           |                                         |                 |
|----------|---------------------------------------------------|----------------------------------------|----------------------------|-----------------------------------------|-----------------|
|          |                                                   |                                        | Added<br>( $\mu\text{M}$ ) | Found<br>( $\mu\text{M}$ ) <sup>a</sup> | Recovery<br>(%) |
| Sample 1 | 0.18 $\pm$ 0.04                                   | 0.22 $\pm$ 0.05                        | 0.40                       | 0.59 $\pm$ 0.04                         | 95              |
|          |                                                   |                                        | 0.60                       | 0.80 $\pm$ 0.03                         | 98              |
|          |                                                   |                                        | 0.80                       | 1.03 $\pm$ 0.01                         | 101             |
| Sample 2 | 0.26 $\pm$ 0.01                                   | 0.24 $\pm$ 0.03                        | 0.40                       | 0.60 $\pm$ 0.05                         | 94              |
|          |                                                   |                                        | 0.60                       | 0.83 $\pm$ 0.01                         | 99              |
|          |                                                   |                                        | 0.80                       | 1.05 $\pm$ 0.02                         | 101             |

3

4 <sup>a</sup> Average of three measurements  $\pm$  standard deviation.

5

6

7

8

9
